# Supplementary material for: Design and performance study of fabric-based incontinence monitoring sensor
Source: Research Square preprint supplement (doi:10.21203/rs.3.rs-6231575/v1), 2025-05-02
Supplement: Supplementary file 1 [file f0f80477c60f4b7bf22a6791.docx]

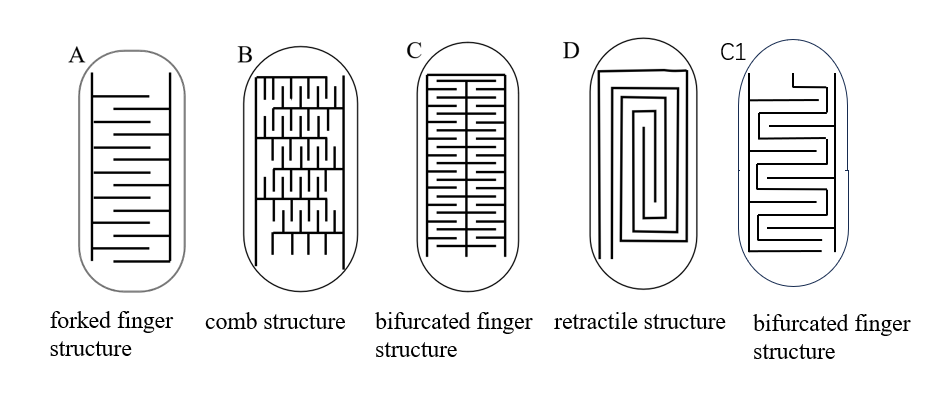


Fig. 1 Design of urine leakage frequency sensing electrode patterns


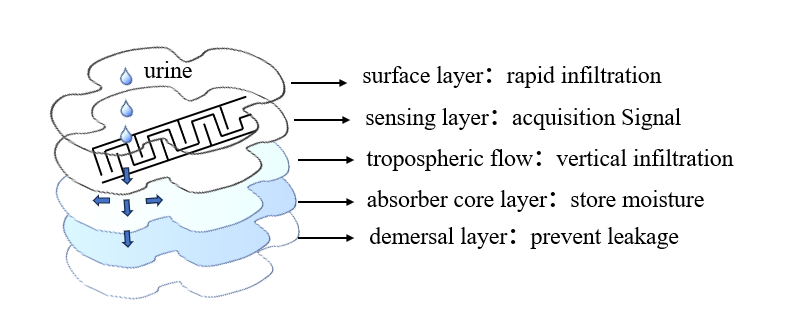


Fig. 2 Schematic diagram of the structure of the sensing diaper and liquid absorption (as an example of pattern A)


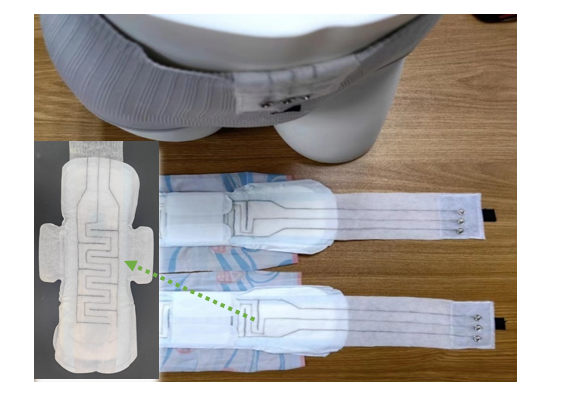


Fig. 3 Physical drawing of the sensing diaper (taking pattern C1 as an example)


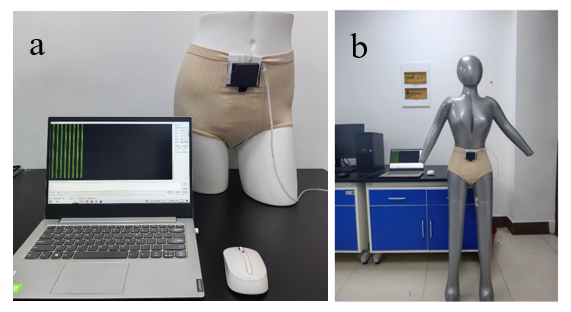


Fig. 4 a Static model upper body test plot; b Static model upper body test plot


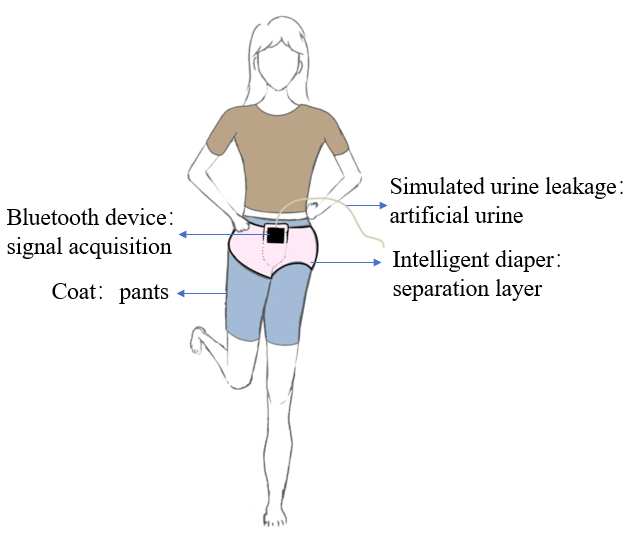


Fig. 5 Volunteer outerwear schematic


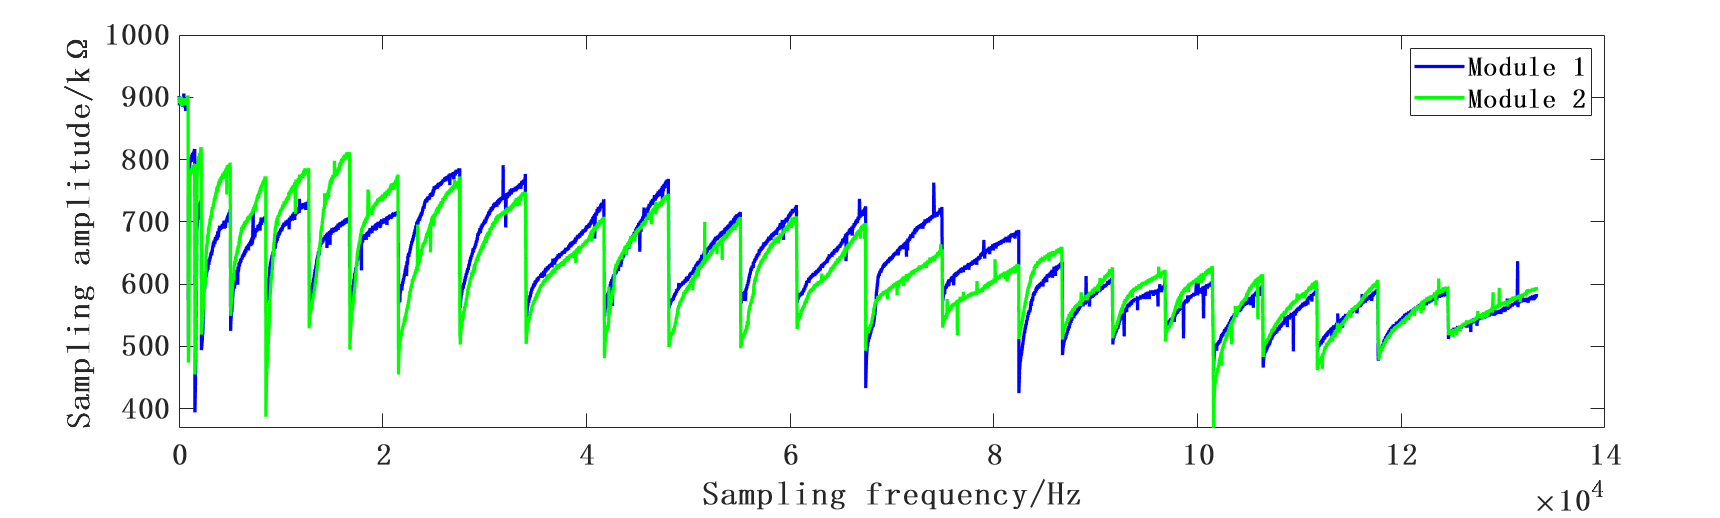


Fig. 6 Waveform variation of experimental data for simulated mild urine leakage


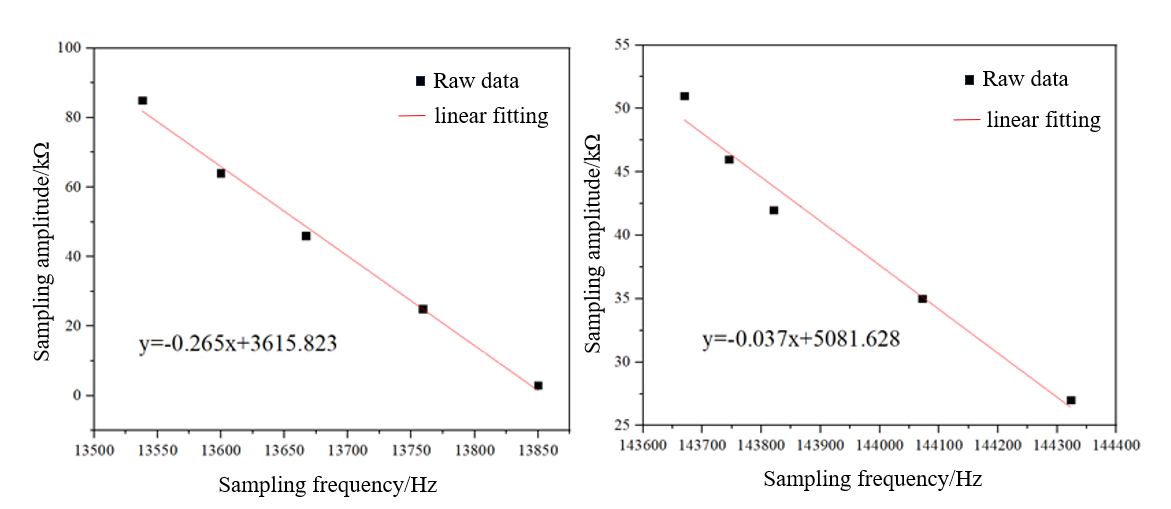


Fig. 7 Linear fit of normal and abnormal urine leakage waveforms


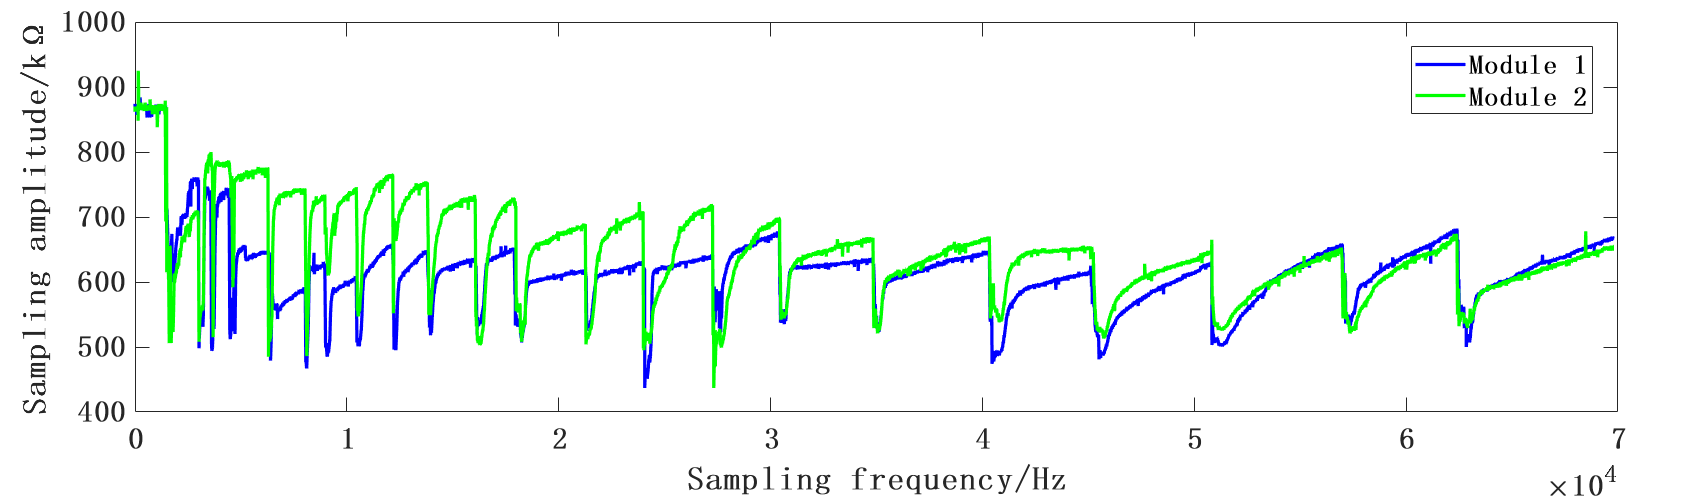


Fig. 8 Waveform variation of experimental data for simulated moderate urine leakage


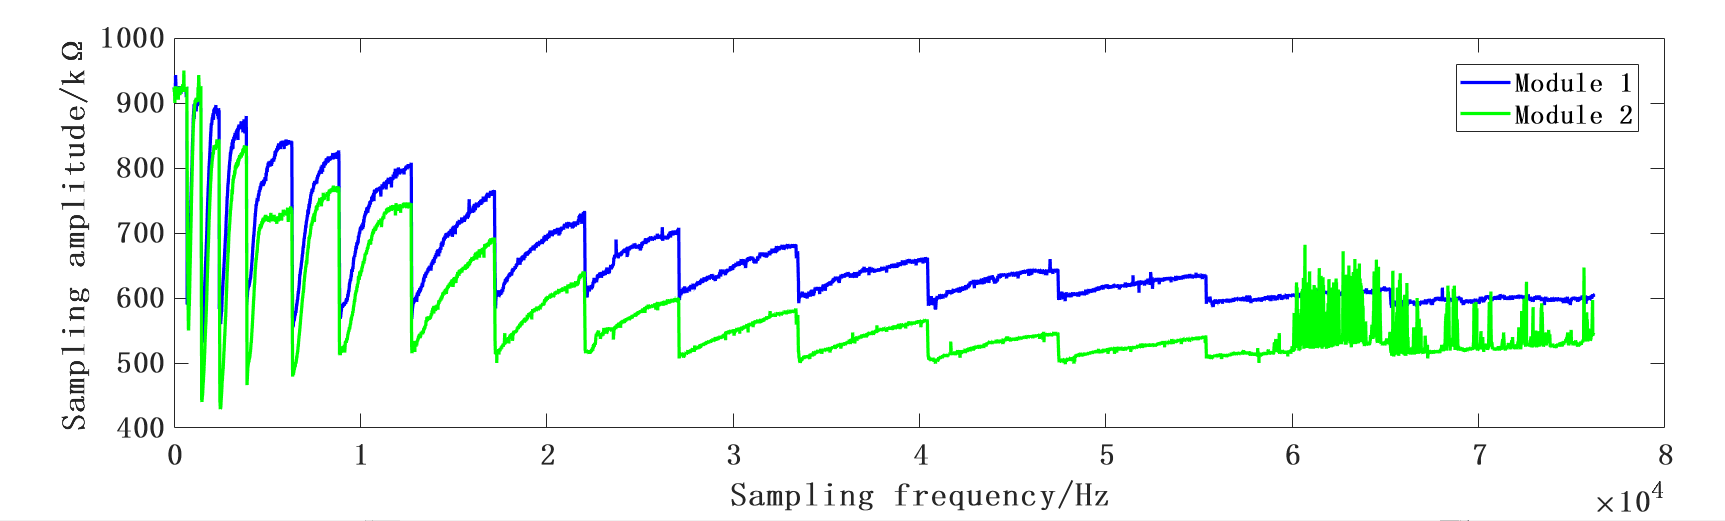


Fig. 9 Waveform variation of experimental data for simulated heavy urine leakage


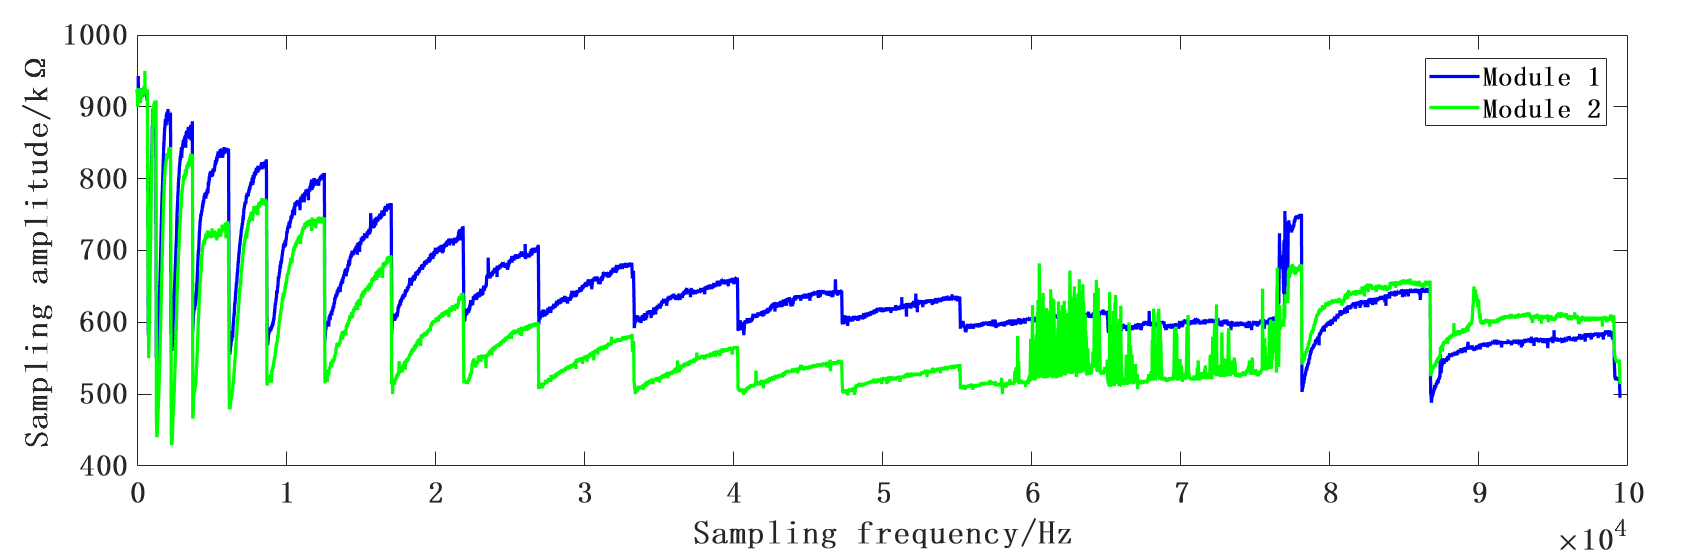


Fig. 10 Variation of waveforms of randomized drop test data for mild, moderate, and severe urine leakage

| 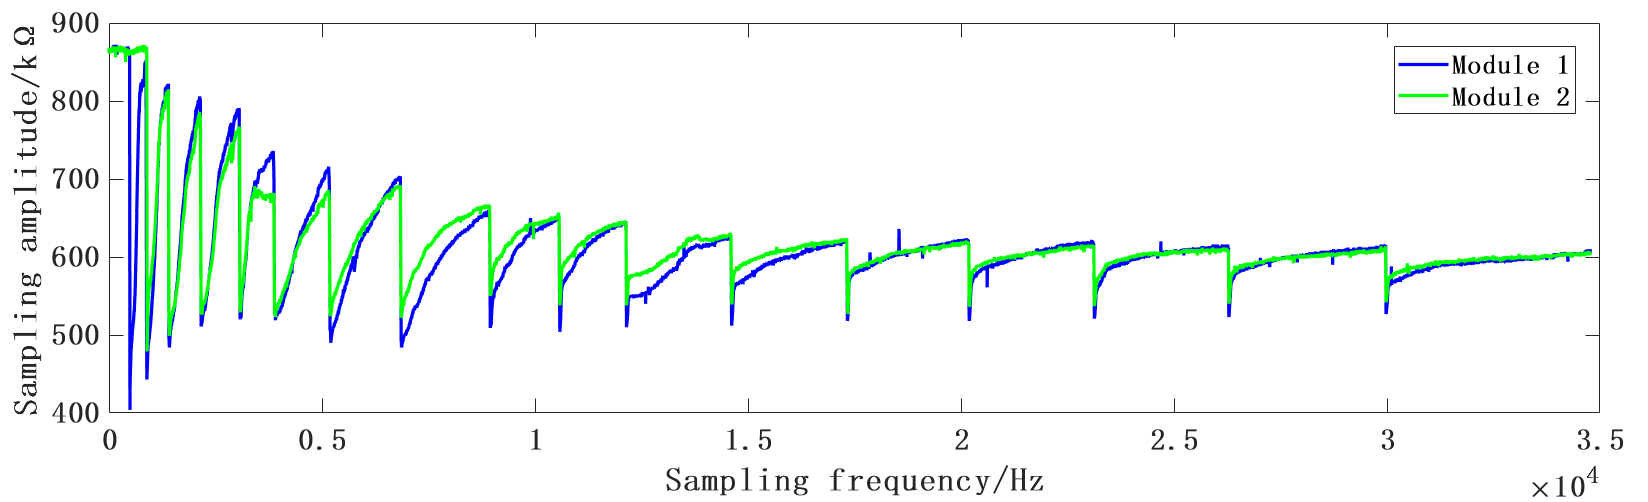 |
| --- |
|  |


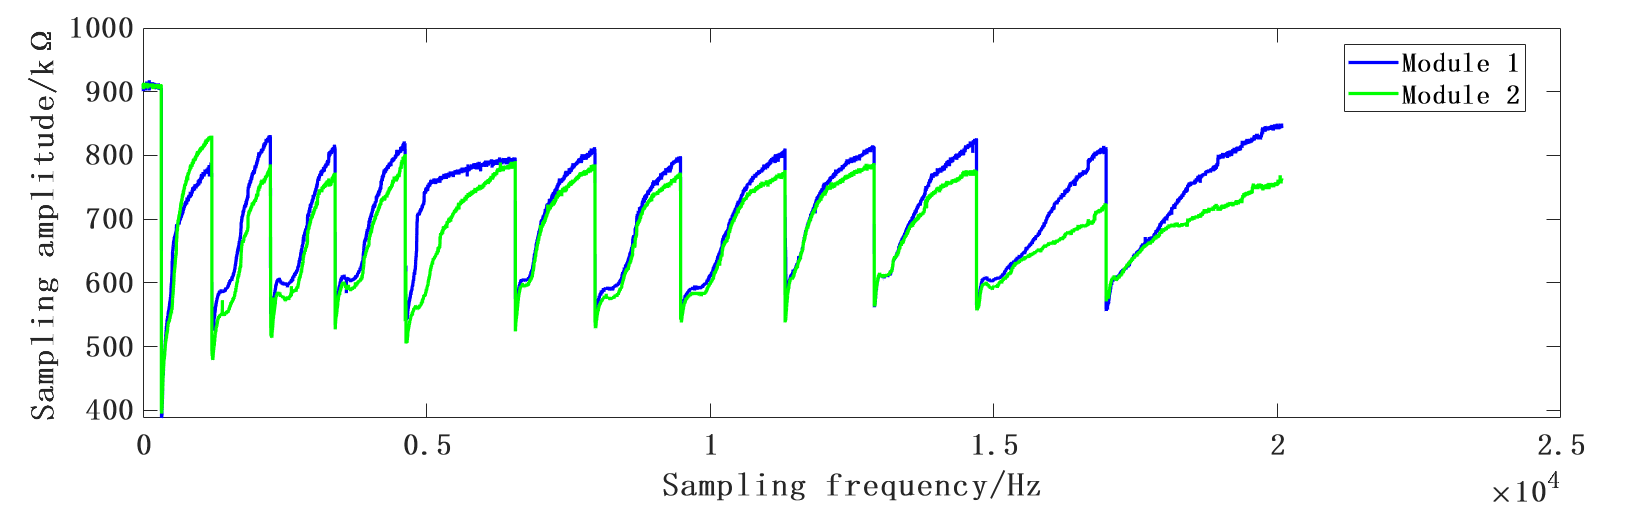


Fig. 11 Simulation modeling dynamic test data waveform changes

(a) First round (b) Second round


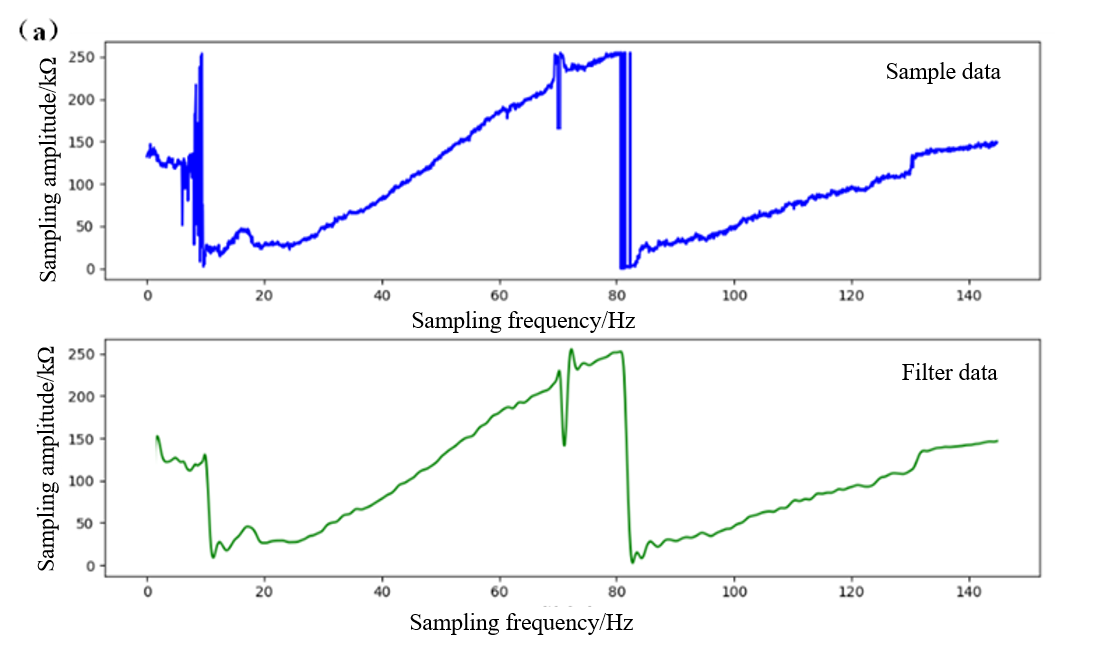


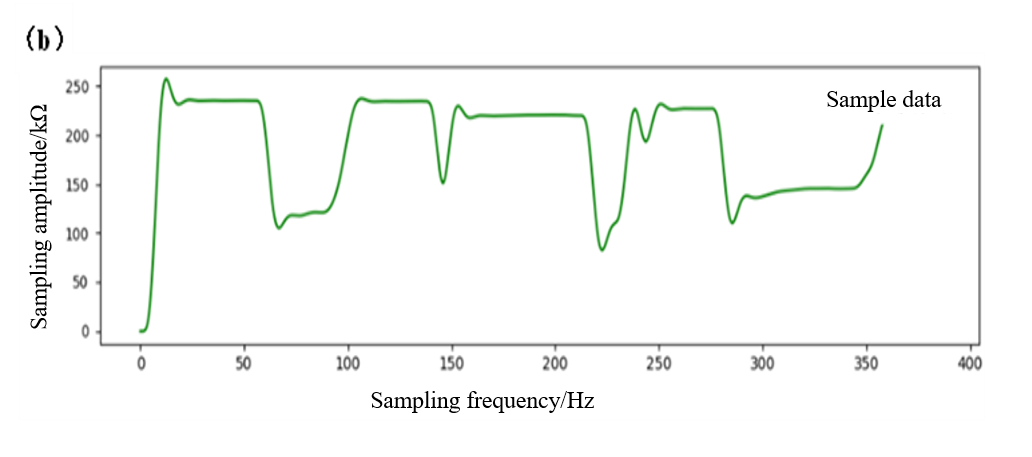


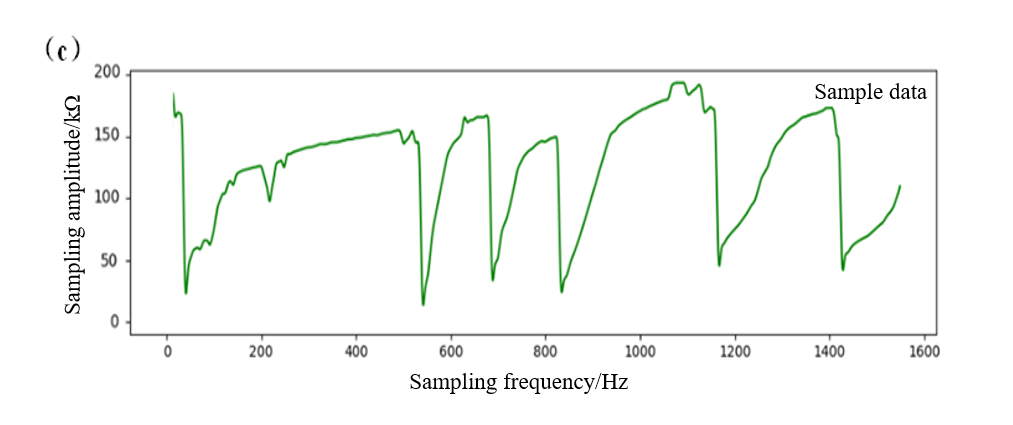


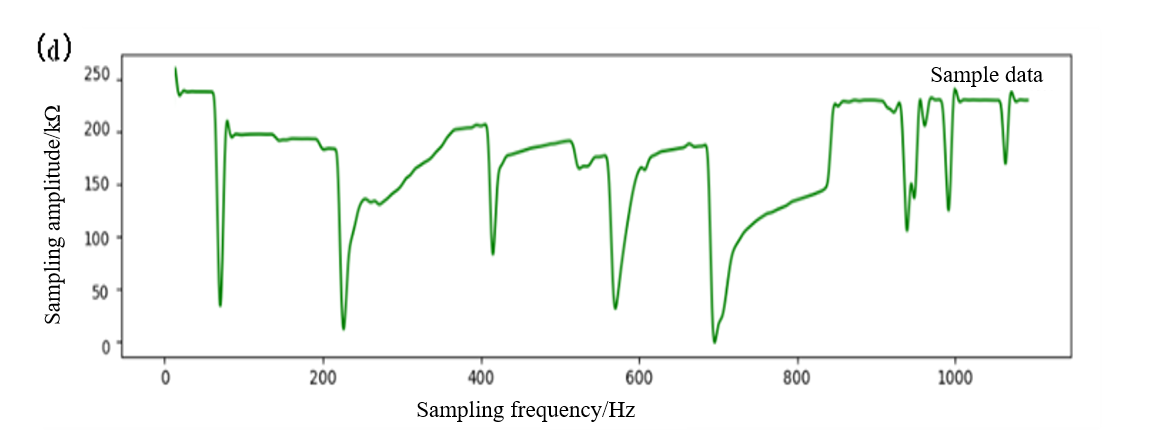


Fig. 12 Volunteer static analog wear test data waveform variation graphs

(a) leakage of urine 2 times; (b) leakage of urine 4 times; (b) leakage of urine 6 times; (d) leakage of urine 8 times


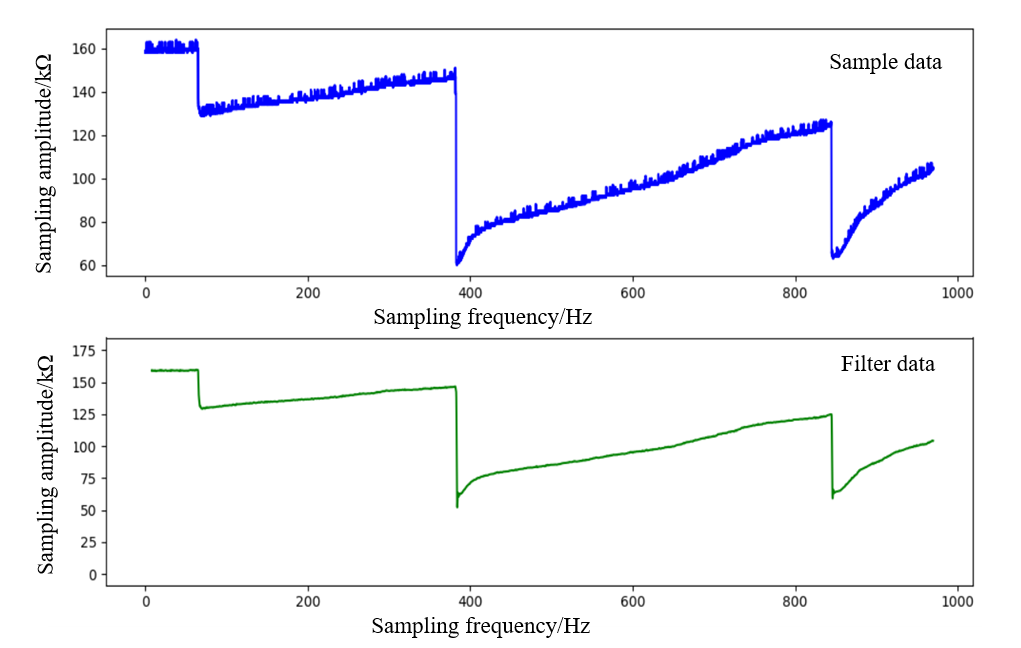


Fig. 13 Waveform variation of dynamic first round test data


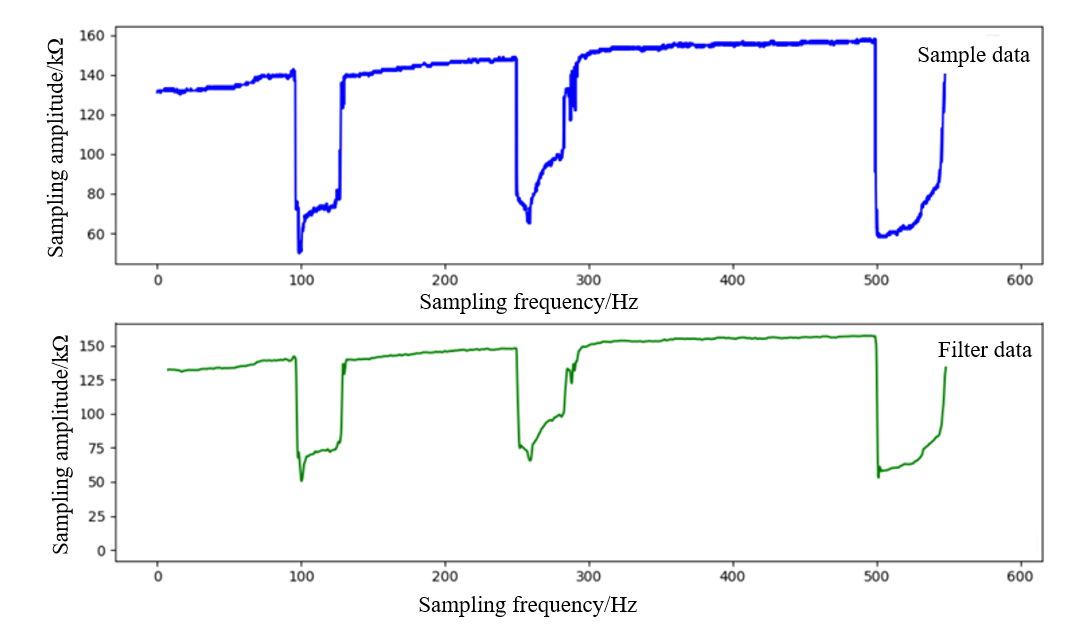


Fig. 14 Dynamic second round of test data waveform variations


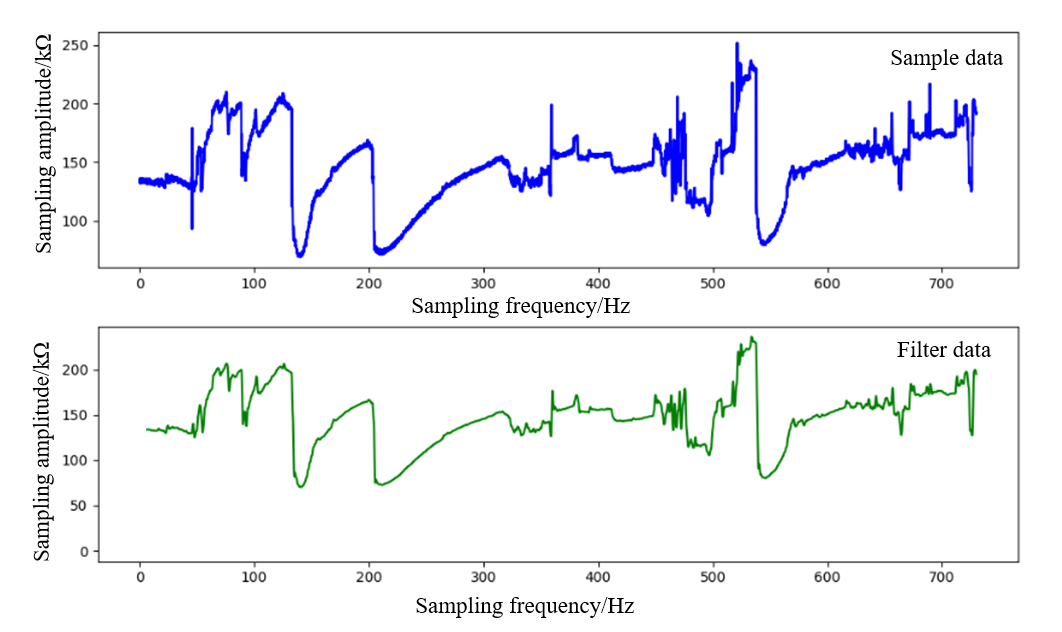


Fig. 15 Waveform variation of dynamic third round test data
